# Supplementary material for: Crocodilepox Virus Evolutionary Genomics Supports Observed Poxvirus Infection Dynamics on Saltwater Crocodile (Crocodylus porosus)
Source: PubMed Central journal article supplement (PMC6950651; doi:10.3390/v11121116), 2019-12-02
Supplement: viruses-11-01116-s001.pdf [file viruses-11-01116-s001.pdf]

**Crocodilepox virus evolutionary genomics supports observed poxvirus infection dynamics on saltwater crocodile (*Crocodylus porosus*)**

**Subir Sarker,<sup>a,\*</sup> Sally R Isberg,<sup>b,c</sup> Jasmin L Moran,<sup>b</sup> Rachel De Araujo,<sup>d</sup> Nikki Elliott,<sup>d</sup> Lorna Melville,<sup>d</sup> Travis Beddoe,<sup>e</sup> Karla J Helbig,<sup>a,\*</sup>**

<sup>a</sup>Department of Physiology, Anatomy and Microbiology, School of Life Sciences, La Trobe University, Bundoora, VIC 3086, Australia

<sup>b</sup>Centre for Crocodile Research, Noonamah, NT, Australia

<sup>c</sup>School of Psychological and Clinical Sciences, Charles Darwin University, Darwin, NT, Australia

<sup>d</sup>Berrimah Veterinary Laboratory, Northern Territory Government, Darwin, Northern Territory, Australia

<sup>e</sup>Department of Agriculture Sciences, School of Life Sciences, La Trobe University, Bundoora, VIC 3086, Australia

**\* Authors for correspondence:**

Dr Subir Sarker, Department of Physiology, Anatomy and Microbiology, School of Life Sciences, La Trobe University, Bundoora, VIC 3086, Australia, email: s.sarker@latrobe.edu.au; phone: +61 3 9479 2317; fax: +61 3 9479 1222.

Associate Professor Karla Helbig, Department of Physiology, Anatomy and Microbiology, School of Life Sciences, La Trobe University, Bundoora, VIC 3086, Australia, email: k.helbig@latrobe.edu.au; phone: +61 3 9479 6650; fax: +61 3 9479 1222.

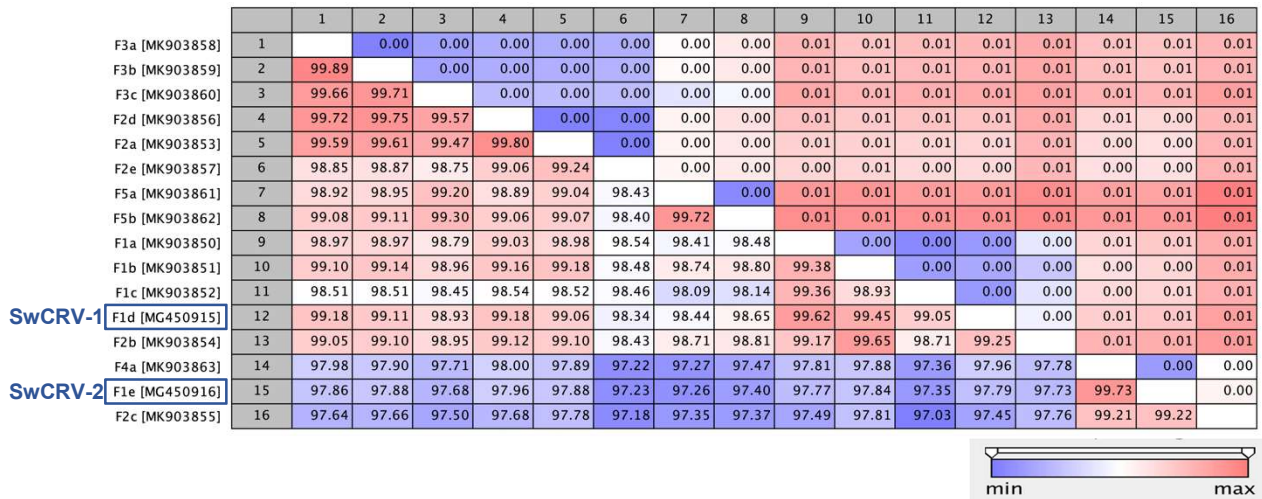

**Figure S1: Pairwise comparison on 16 genome sequences of SwCRV, including 14 SwCRV genomes isolated in this study.** Upper diagonal indicates the distance between two sequences, and the lower diagonal shows percentage identity between two sequences.

**Table S1.** Predicted recombination events among SwCRV genomes sequenced in this study

| Events | Breakpoint positions |         |                            |         | Recombinant Sequence(s)      | Minor Parental Sequence(s)  | Major Parental Sequence(s) | Detection methods |           |          |          |          |          |          |
|--------|----------------------|---------|----------------------------|---------|------------------------------|-----------------------------|----------------------------|-------------------|-----------|----------|----------|----------|----------|----------|
|        | In alignment         |         | In recombinant sequence(s) |         |                              |                             |                            | RDP               | GENECONV  | Bootscan | Maxchi   | Chimaera | SiScan   | 3Seq     |
|        | Begin                |         | Begin                      | End     |                              |                             |                            |                   |           |          |          |          |          |          |
| RE1    | 28110                | 51457   | 27930                      | 51257   | F2b, F1a-F1c, F1d            | F3a-F3c                     | F4a, F1e                   | 4.62E-106         | 3.46E-164 | 7.82E-74 | 7.60E-48 | 9.34E-48 | 6.11E-34 | 6.22E-14 |
| RE2    | 6956                 | 25638   | 6700                       | 25316   | F3a-F3b, ^F3c, F2a, F2d, F2e | F2c                         | F5a-F5b                    | 1.14E-121         | 7.04E-123 | 1.54E-34 | 1.15E-37 | 6.38E-39 | 5.64E-22 | 6.22E-14 |
| RE3    | 168605               | 170188  | 168001                     | 169104  | F5a, ^F5b                    | Unknown                     | F3c                        | 1.63E-77          | 5.61E-74  | 1.52E-77 | 2.10E-22 | 1.84E-22 | 3.68E-22 | 1.24E-13 |
| RE4    | 25639*               | 39486   | 24905*                     | 38711   | F5a, ^F5b                    | Unknown                     | F2a, F2d, F2e              | 8.96E-57          | 1.12E-62  | 5.96E-63 | 1.93E-27 | 1.29E-27 | -        | 1.24E-13 |
| RE5    | 24733                | 25629*  | 24521                      | 25343*  | F3a-F3c, ^F2c, F2d           | Unknown                     | F1a-F1c, F1d-2, F4a        | 8.41E-62          | 6.26E-55  | 3.71E-65 | 1.95E-25 | 4.29E-25 | -        | 9.17E-52 |
| RE6    | 168516               | 170178  | 165643                     | 167053  | F1e, F4a                     | F3c, F2a, F2d, F2e          | F1a, F1d                   | 1.17E-51          | 7.29E-57  | 1.31E-58 | 3.36E-23 | 6.07E-16 | 9.78E-33 | 6.22E-14 |
| RE7    | 179026               | 6955*   | 178565                     | 6833*   | F2a, ^F2d, F2e               | F1d                         | F3a-F3c, F5a-2             | 7.80E-57          | 1.89E-29  | 4.33E-22 | 8.35E-26 | 6.12E-27 | 8.58E-19 | 1.31E-03 |
| RE8    | 166912               | 173988  | 166684                     | 173168  | ^F1b                         | F2b                         | F1a, F1c                   | 1.81E-49          | 1.68E-47  | 1.80E-49 | 3.06E-24 | 5.67E-24 | 1.18E-20 | 6.22E-14 |
| RE9    | 178352               | 184700  | 178215                     | 184552  | F1d, F2a, F2d, F4a           | Unknown                     | F1a-F1c                    | 2.52E-37          | 6.18E-46  | 2.06E-44 | 1.42E-15 | 1.34E-15 | 5.27E-14 | 6.22E-14 |
| RE10   | 39487*               | 105464  | 39148*                     | 105080  | F5a, ^F3c                    | F3a-F3b                     | F5b                        | 1.13E-37          | 4.09E-37  | 1.14E-24 | 1.04E-20 | 7.19E-21 | 4.06E-30 | 6.22E-14 |
| RE11   | 174248               | 178988* | 172273                     | 176999* | F2a, F2d, ^F2e               | F1e, F4a                    | F5b                        | 7.71E-34          | 5.53E-36  | 1.40E-24 | 8.06E-15 | 5.17E-15 | 2.53E-02 | 6.22E-14 |
| RE12   | 7918                 | 21690   | 7794                       | 21519   | ^F2b                         | Unknown                     | F1a-F1c, F1d-2, F4a        | 4.31E-26          | 2.96E-34  | 3.47E-33 | 2.26E-07 | 5.23E-18 | 8.23E-25 | 8.39E-17 |
| RE13   | 43728                | 51457*  | 43552                      | 51279*  | ^F3a, F3b-F3c, F2b           | Unknown                     | F2a, F2d, F2e, F5b         | 1.14E-32          | 1.48E-34  | 1.13E-32 | 2.55E-11 | 7.30E-11 | 8.76E-07 | 6.22E-14 |
| RE14   | 171517*              | 176653  | 171017*                    | 176137  | F3a, ^F3b                    | F1e, F4a                    | F3c, F5a-2                 | 1.32E-28          | 3.69E-29  | 1.33E-28 | 1.77E-12 | 4.09E-12 | -        | 6.22E-14 |
| RE15   | 173989*              | 178328  | 173244*                    | 177566  | F2b                          | F3a-F3c, F5a-2              | F1a-3                      | 1.40E-28          | -         | 1.80E-03 | 7.73E-09 | 2.56E-10 | 2.36E-08 | 1.24E-13 |
| RE16   | 63497                | 71860   | 63284                      | 71647   | F1a-3, F1d                   | F3a-2, F5a-2, F2a, F2d, F2e | F2b                        | 5.17E-21          | 1.87E-17  | 1.72E-07 | 1.02E-06 | 1.00E-06 | -        | 6.22E-14 |
| RE17   | 151594               | 169174  | 151372                     | 168939  | ^F2b                         | Unknown                     | F1a, F1c, F1d              | 2.91E-20          | 6.10E-05  | -        | 5.99E-03 | 1.42E-02 | -        | 6.22E-14 |
| RE18   | 184701*              | 1658    | 181555*                    | 1547    | ^F1e                         | Unknown                     | F4a                        | 2.89E-19          | 7.47E-12  | 1.58E-18 | 3.23E-09 | 2.92E-09 | 1.45E-05 | 6.22E-14 |
| RE19   | 36812                | 40388   | 34150                      | 37726   | ^F4a                         | F2b                         | Unknown                    | -                 | 6.33E-16  | -        | 1.81E-05 | 1.77E-05 | 9.85E-29 | 2.05E-10 |

|      |         |         |         |         |                       |                    |               |          |          |          |          |          |          |          |
|------|---------|---------|---------|---------|-----------------------|--------------------|---------------|----------|----------|----------|----------|----------|----------|----------|
| RE20 | 49569   | 50176   | 49060   | 49667   | ^F1a, F1c             | F2a, F2d, F2e, F1e | F1b           | -        | 1.56E-13 | -        | 2.94E-03 | 2.94E-03 | -        | 3.22E-07 |
| RE21 | 173382  | 184700* | 170257  | 181554* | F4a, ^F1e             | Unknown            | F1a-3         | 2.42E-13 | 1.58E-13 | 7.53E-12 | 1.25E-12 | 5.59E-04 | 9.04E-08 | 1.87E-13 |
| RE22 | 131012  | 142784  | 130796  | 142559  | ^F1b, F2b             | F2c                | F1a, F1c, F1d | 2.84E-09 | 4.42E-10 | 2.88E-09 | 1.25E-05 | 2.00E-04 | 6.08E-19 | 3.96E-08 |
| RE23 | 36812*  | 38627   | 33975*  | 35790   | ^F1e, F2c             | F2b                | Unknown       | 5.13E-03 | 1.09E-07 | -        | 1.60E-02 | -        | 1.40E-29 | 2.63E-04 |
| RE24 | 174281* | 175339  | 173751* | 174795  | ^F1a, F1b-3, F1d, F2c | F1e                | F3c, F5a-2    | 1.26E-06 | 1.93E-08 | -        | 3.98E-08 | 2.12E-03 | 8.40E-10 | 1.37E-07 |

\* = The actual breakpoint position is undetermined (it was most likely overprinted by a subsequent recombination event).

^ = The recombinant sequence may have been misidentified (one of the identified parents might be the recombinant)

- = No significant P-value was recorded for this recombination event using this method.

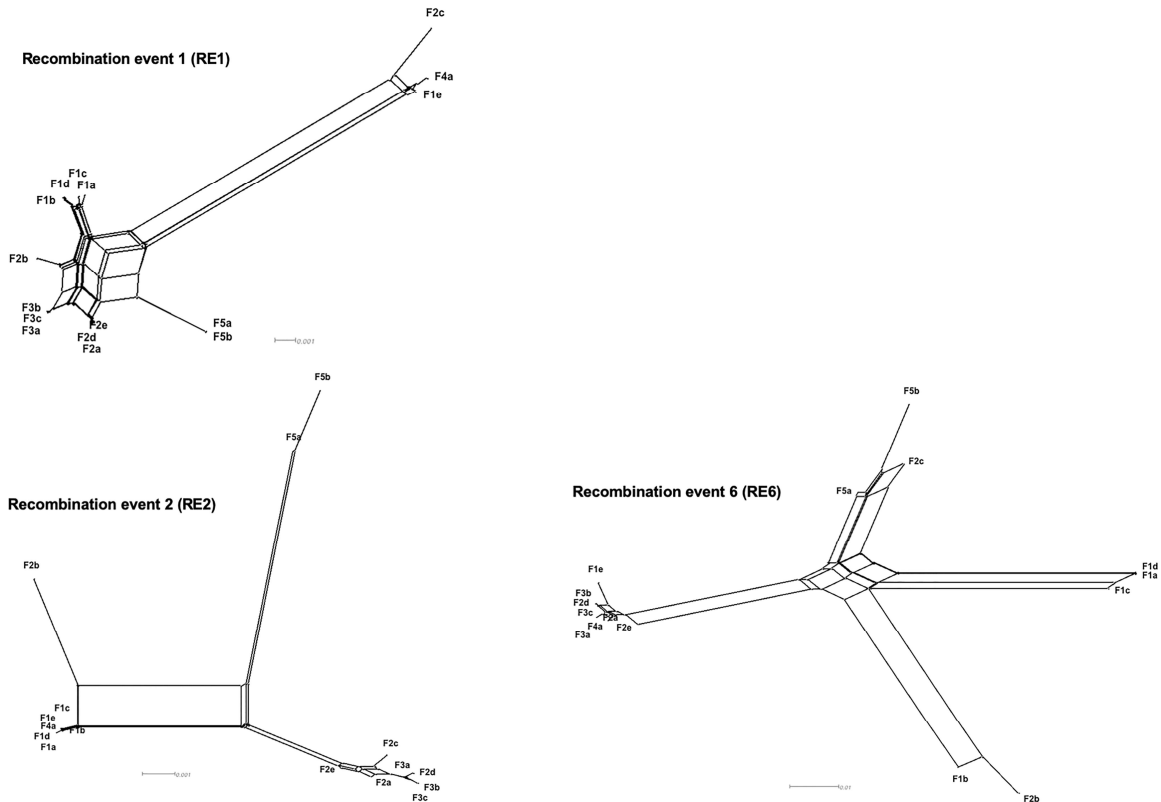

**Figure S2:** NeighborNet trees were generated using selected recombination segments (recombination events RE1, -RE2 and -RE6).

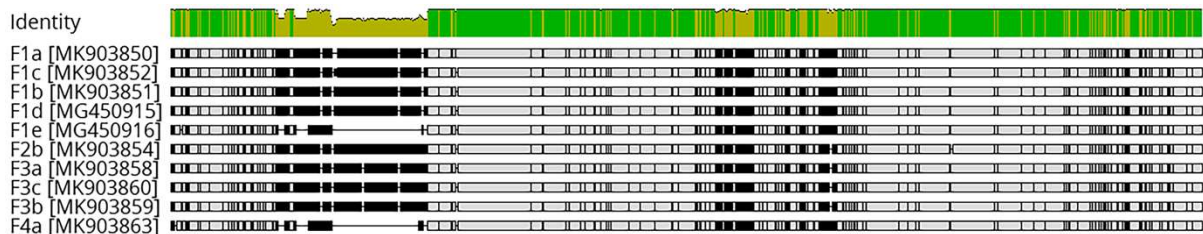

**Figure S3:** Consensus identity graph representing the mean pairwise identity over all pairs in the column (RE1 segment); where, colour green: 100% identity, greeny-brown: at least 30% and under 100% identity and red: below 30% identity. Vertical black lines highlighting the disagreement of individual SwCRV sequence in comparison to consensus.

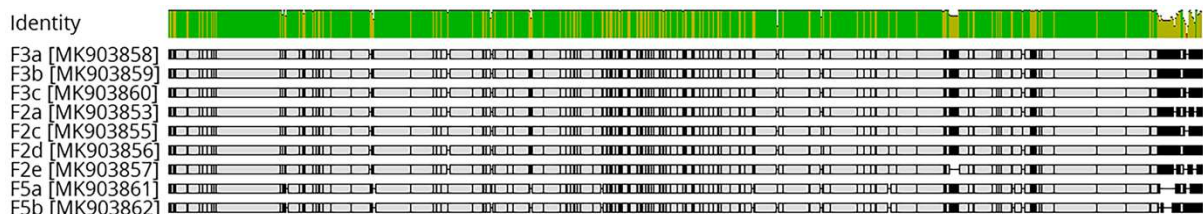

**Figure S4:** Consensus identity graph representing the mean pairwise identity over all pairs in the column (RE2 segment); where, colour green: 100% identity, greeny-brown: at least 30% and under 100% identity and red: below 30% identity. Vertical black lines highlighting the disagreement of individual SwCRV sequence in comparison to consensus.

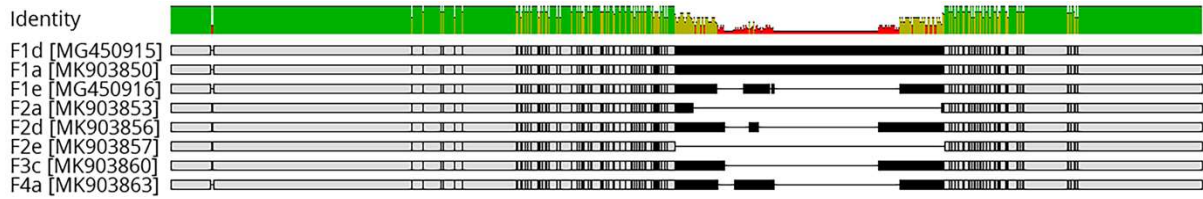

**Figure S5:** Consensus identity graph representing the mean pairwise identity over all pairs in the column (RE6 segment); where, colour green: 100% identity, greeny-brown: at least 30% and under 100% identity and red: below 30% identity. Vertical black lines highlighting the disagreement of individual SwCRV sequence in comparison to consensus.

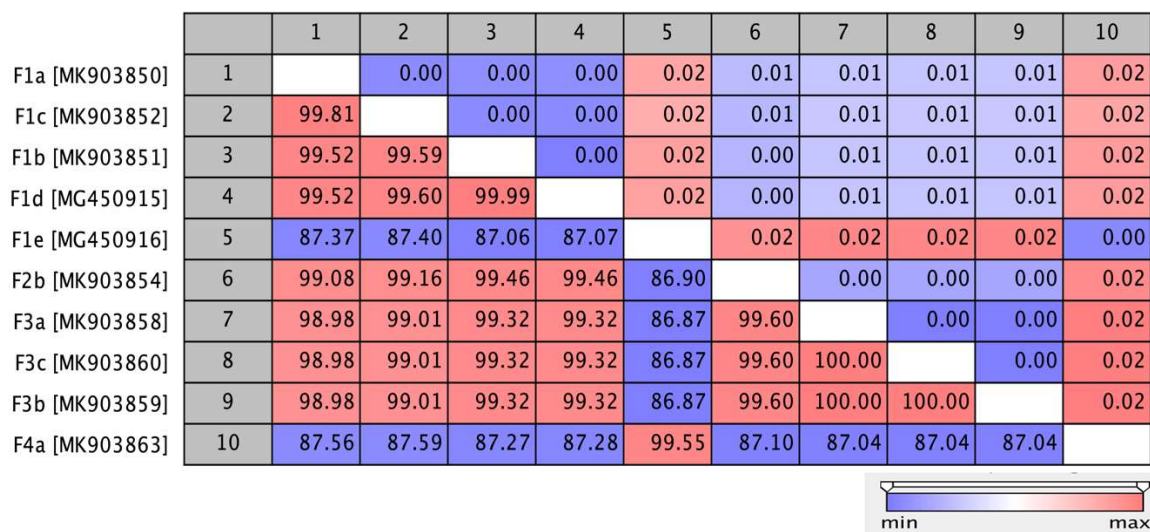

**Figure S6:** Pairwise comparison on RE1 segment among the SwCRV sequences involved. Upper comparison gradient indicated the distance between two sequences, and lower comparison gradient indicated percentage identity between two sequences.

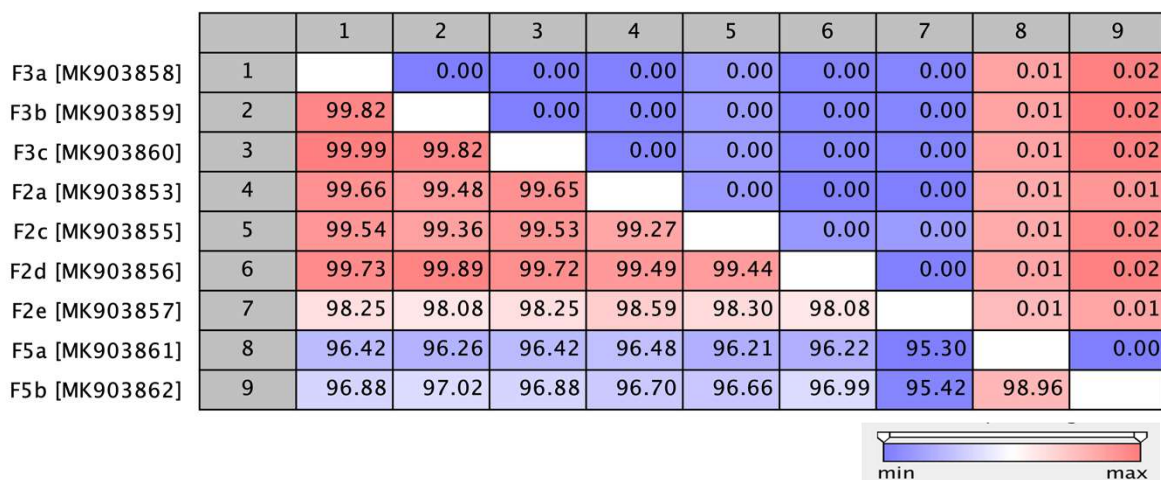

**Figure S7:** Pairwise comparison on RE2 segment among the SwCRV sequences involved. Upper comparison gradient indicated the distance between two sequences, and lower comparison gradient indicated percentage identity between two sequences.

|                | 1 | 2      | 3     | 4     | 5     | 6     | 7     | 8     |
|----------------|---|--------|-------|-------|-------|-------|-------|-------|
| F1d [MG450915] | 1 | 0.00   | 0.14  | 0.10  | 0.13  | 0.09  | 0.13  | 0.12  |
| F1a [MK903850] | 2 | 100.00 | 0.14  | 0.10  | 0.13  | 0.09  | 0.13  | 0.12  |
| F1e [MG450916] | 3 | 74.40  | 74.40 | 0.00  | 0.01  | 0.00  | 0.00  | 0.02  |
| F2a [MK903853] | 4 | 68.49  | 68.49 | 88.83 | 0.00  | 0.00  | 0.00  | 0.00  |
| F2d [MK903856] | 5 | 75.29  | 75.29 | 93.90 | 88.24 | 0.00  | 0.00  | 0.01  |
| F2e [MK903857] | 6 | 67.41  | 67.41 | 86.70 | 97.62 | 86.13 | 0.00  | 0.00  |
| F3c [MK903860] | 7 | 74.92  | 74.92 | 93.42 | 89.11 | 99.02 | 86.99 | 0.00  |
| F4a [MK903863] | 8 | 76.69  | 76.69 | 96.57 | 87.51 | 92.69 | 85.42 | 92.15 |

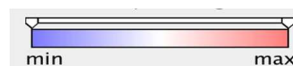

**Figure S8: Pairwise comparison on RE6 segment among the SwCRV sequences involved.** Upper comparison gradient indicated the distance between two sequences, and lower comparison gradient indicated percentage identity between two sequences.
